# Supplementary material for: The Wnt signaling pathway is involved in the regulation of phagocytosis of virus in Drosophila
Source: PubMed Central journal article supplement — Sci Rep. 2013 Jun 25;3:2069. doi: 10.1038/srep02069 (PMC3691566; doi:10.1038/srep02069), 2013-06-25
Supplement: srep02069-s1.pdf [file srep02069-s1.pdf]

# The Wnt signaling pathway is involved in the regulation of phagocytosis of virus in *Drosophila*

Fei Zhu<sup>1,2</sup>, Xiaobo Zhang<sup>1\*</sup>

## Supplementary Information

**Figure S1** | WSSV quantitative analysis at 1–5 days after WSSV inoculation of S2 cells by TaqMan real-time PCR.

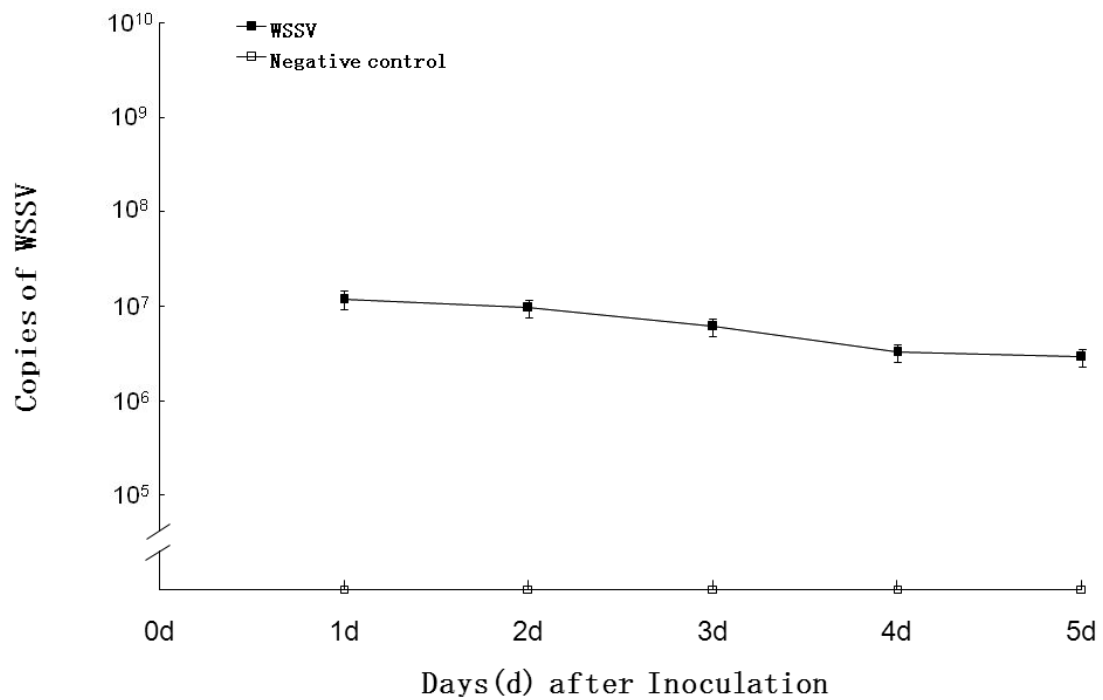

**Table S1.** Gene expression profiles of the Wnt pathway.

| Gene (GenBank accession number) | Inactivated | Non-inactivated | Inactivated |
|---------------------------------|-------------|-----------------|-------------|
|                                 | DCV         | DCV             | WSSV        |
| Dally (AAF50358)                | 2.23        | 2.41            | 2.21        |
| Fz2 (AAF49184)                  | 0.44        | 0.43            | 0.41        |
| Daam (AAF45600)                 | 2.17        | 2.15            | 2.23        |
| NimC1 (AAF53364)                | 0.03        | 0.03            | 0.10        |
| NimC2 (AAF53366)                | 0.34        | 0.41            | 0.33        |
| Bsk (AAF52883)                  | 1.77        | 1.81            | 1.69        |
| Tws (AAF54498)                  | 1.06        | 1.01            | 0.98        |
| Dsh (AAF48033)                  | 0.86        | 0.82            | 0.93        |
| Arm (AAF45687)                  | 0.74        | 0.75            | 0.95        |
| Sgg (AAF45801)                  | 1.00        | 1.00            | 1.54        |
| Rho1 (AAF58066)                 | 1.74        | 1.73            | 1.52        |
| Wnt2 (AAF58933)                 | 0.95        | 0.91            | 0.99        |
| Nkd (AAF49198)                  | 4.80        | 4.23            | 0.54        |
| Axn (AAF56993)                  | 1.34        | 1.28            | 0.73        |
| Apc (AAB41404)                  | 1.49        | 1.51            | 0.64        |
| Pan (AAF59371)                  | 0.62        | 0.78            | 0.94        |
| Gro (AAF56557)                  | 1.14        | 1.08            | 0.48        |
| Pygo (AAF57161)                 | 1.06        | 1.07            | 0.82        |

Notes:

1) The gene expression levels were compared with that of control (S2 cells without any treatment). The control's was designated as 1.

2) Apc, adenomatous polyposis coli; Arm, Armadillo; Axn, D-axin; Bsk, Jun kinase; DAAM, Dishevelled Associated Activator of Morphogenesis; Dsh, Dishevelled; Fz, Frizzled; Gro, Groucho; Nkd, Naked; pan, pangolin; Pygo, pygopus; Rho1, Rho GTPase 1; Sgg, Glycogen Synthase Kinase 3; Tws, twins.

**Table S2.** Sequences of primers and TaqMan probes used for quantitative real-time PCR.

| <b>Gene</b> | <b>Forward primer (5'-3')</b> | <b>Reverse primer (5'-3')</b> | <b>TaqMan probe (5'-3')</b> |
|-------------|-------------------------------|-------------------------------|-----------------------------|
| Rp49        | ccgcttcaagggacagtatctg        | cacgttgtgcaccaggaactt         | ggcagcatgtggcgggtgcgctt     |
| DAAM        | agtcgccagtccatgatccc          | gctcgtcagcccgctttcg           | ttcctccttgaccagcagacgcaca   |
| arm         | gtatccgccaaggagcagac          | ggtgtccaggtcgaacataagt        | cctccatctcctcgtcctccttgcc   |
| sgg         | tacaagaggtctcctatacagaca      | ttttgattgccaccagttcgc         | ttgcctggaacacgacgccgaagc    |
| fz2         | tgtggtcgggactgtgctt           | tttcggtgtc gatgatgaatg        | tgcagcacgctcatgaccctaac     |
| dally       | ctgcggcacctccaaca             | cgctccatactcctcctcat          | gcgacgcacgacatccagaatg      |
| dsh         | caccatactgccttgettca          | atgccaattcacactactg           | tcttggtggtctccgccga         |
| Amph        | ggtetgaatgcgagtgccaag         | tgctccctcagttccgatgg          | caaccacaaccacgcagacatcgcc   |
| Glt         | ctgagcaactacatcctgtatcgtg     | agcgaggcatctactccgaag         | cagtcagtcataccgctccgtgccg   |
| htl         | ccagtcactcaacgatcacaatg       | ttcgtgatggctgggtcttg          | cgctggtagtgctcttctgttgct    |
| insc        | ccagcgaggaggaggaagtg          | tgtgaaacgaaggatctgactc        | caccaccaccaccgccgccgta      |
| Mmp1        | agttcagtggtcatagtcgtaggc      | aggcccgctggctcgtgtag          | atggcagcggctcaatcggcacc     |
| Myo31DF     | accttcggcaacgcaaagac          | tcgagcagatagttggtgatgat       | aaccgcaacgacaactccagccgc    |
| prc         | ccatccagatacggcagtcac         | taccagggagtcgccttattg         | tccgtatcctggtgtccgcctccg    |

Rp49, Ribosomal protein 49; DAAM, Dishevelled associated activator of morphogenesis; arm, Armadillo; sgg, Shaggy; fz2, Frizzled 2; dsh, Dishevelled; Amph, Amphiphysin; Glt, glutactin; htl, Heartless; insc, Inscutable; Mmp1, Matrix metalloproteinase 1; Myo31DF, Myosin 31DF; prc, Pericardin. TaqMan probes were labeled with FAM at the 5' end and Eclipse at the 3' end.
